# Supplementary material
Source: MDPI journal article supplement (https://www.mdpi.com/2312-7481/10/2/13)
Supplement: s1 [file s1]

# Supplementary Material

## Compatibility of $\text{LaFe}_{13-x-y}\text{Mn}_x\text{Si}_y\text{H}_{1.6}$ and Eutectic Liquid $\text{GaInSn}$ Alloy <sup>†</sup>

Jamieson Brechtel <sup>1,\*</sup>, Joseph Rendall <sup>1</sup>, Mingkan Zhang <sup>1</sup>, Michael R. Koehler <sup>2</sup>, Kashif Nawaz <sup>1</sup> and Ayyoub M. Momen <sup>3</sup>

<sup>1</sup> Buildings and Transportation Science Division, Oak Ridge National Laboratory, Oak Ridge, TN 37830, USA; rendalljd@ornl.gov (J.R.); zhangm1@ornl.gov (M.Z.); nawazk@ornl.gov (K.N.)

<sup>2</sup> IAMM Diffraction Facility, Institute for Advanced Materials & Manufacturing, University of Tennessee, Knoxville, TN 37920, USA; mkoehler@utk.edu (M.R.K.)

<sup>3</sup> Ultrasonic Technology Solutions, Knoxville, TN 37932, USA; ayyoubmomen@ultratechsol.com (A.M.M.)

\* Correspondence: brechteljm@ornl.gov

<sup>†</sup> This manuscript has been authored in part by UT-Battelle, LLC, under contract DE-AC05-00OR22725 with the U.S. Department of Energy (DOE). The U.S. government retains the rights and the publisher, by accepting the article for publication, acknowledges that the U.S. government retains a nonexclusive, paid-up, irrevocable, worldwide license to publish or reproduce the published form of this manuscript, or allow others to do so, for U.S. government purposes. DOE will provide public access to these results of federally sponsored research in accordance with the DOE Public Access Plan (<http://energy.gov/downloads/doe-public-access-plan>).

**Table S1.** Results of the qualitative and quantitative phase analysis for the as-received magnetocaloric powders S1 – S11.

| Sample | Phase                                                   | Wt. % | Crystal System | Space Group (No.)                | Lattice Parameter (Å)    | Volume (Å <sup>3</sup> ) |
|--------|---------------------------------------------------------|-------|----------------|----------------------------------|--------------------------|--------------------------|
| S1     | $\text{LaFe}_{11.31}\text{Si}_{1.69}\text{H}_{1.51}$ I  | 8.1   | Cubic          | $\text{Fm}\bar{3}\text{c}$ (226) | $a = 11.60$              | 1,561.16                 |
|        | $\text{LaFe}_{11.31}\text{Si}_{1.69}\text{H}_{1.51}$ II | 88.2  | Cubic          | $\text{Fm}\bar{3}\text{c}$ (226) | $a = 11.56$              | 1,544.98                 |
|        | $\text{Mn}_3\text{Si}$                                  | 3.1   | Cubic          | $\text{Fm}\bar{3}\text{m}$ (225) | $a = 5.74$               | 188.72                   |
|        | $\text{La}_2\text{O}_3$                                 | 0.5   | Hexagonal      | $\text{P}\bar{3}\text{m}1$ (164) | $a = 3.94$<br>$c = 6.14$ | 82.68                    |
| S2     | $\text{LaFe}_{11.31}\text{Si}_{1.69}\text{H}_{1.51}$ I  | 22.5  | Cubic          | $\text{Fm}\bar{3}\text{c}$ (226) | $a = 11.58$              | 1,554.14                 |
|        | $\text{LaFe}_{11.31}\text{Si}_{1.69}\text{H}_{1.51}$ II | 74.1  | Cubic          | $\text{Fm}\bar{3}\text{c}$ (226) | $a = 11.56$              | 1,545.55                 |
|        | $\text{Mn}_3\text{Si}$                                  | 2.8   | Cubic          | $\text{Fm}\bar{3}\text{m}$ (225) | $a = 5.74$               | 188.72                   |
|        | $\text{La}_2\text{O}_3$                                 | 0.6   | Hexagonal      | $\text{P}\bar{3}\text{m}1$ (164) | $a = 3.94$<br>$c = 6.14$ | 82.68                    |
| S3     | $\text{LaFe}_{11.31}\text{Si}_{1.69}\text{H}_{1.51}$ I  | 23.0  | Cubic          | $\text{Fm}\bar{3}\text{c}$ (226) | $a = 11.58$              | 1,554.09                 |
|        | $\text{LaFe}_{11.31}\text{Si}_{1.69}\text{H}_{1.51}$ II | 73.5  | Cubic          | $\text{Fm}\bar{3}\text{c}$ (226) | $a = 11.56$              | 1,545.96                 |
|        | $\text{Mn}_3\text{Si}$                                  | 3.1   | Cubic          | $\text{Fm}\bar{3}\text{m}$ (225) | $a = 5.74$               | 188.72                   |
|        | $\text{La}_2\text{O}_3$                                 | 0.4   | Hexagonal      | $\text{P}6_3/\text{m}$ (176)     | $a = 3.94$<br>$c = 6.14$ | 82.68                    |
| S4     | $\text{LaFe}_{11.31}\text{Si}_{1.69}\text{H}_{1.51}$ I  | 31.9  | Cubic          | $\text{Fm}\bar{3}\text{c}$ (226) | $a = 11.58$              | 1,554.62                 |
|        | $\text{LaFe}_{11.31}\text{Si}_{1.69}\text{H}_{1.51}$ II | 63.5  | Cubic          | $\text{Fm}\bar{3}\text{c}$ (226) | $a = 11.57$              | 1,547.61                 |
|        | $\text{Mn}_3\text{Si}$                                  | 4.2   | Cubic          | $\text{Fm}\bar{3}\text{m}$ (225) | $a = 5.74$               | 188.72                   |
|        | $\text{La}_2\text{O}_3$                                 | 0.4   | Hexagonal      | $\text{P}\bar{3}\text{m}1$ (164) | $a = 3.94$<br>$c = 6.14$ | 82.68                    |

|     |                                                               |      |           |                      |                      |          |
|-----|---------------------------------------------------------------|------|-----------|----------------------|----------------------|----------|
| S5  | LaFe <sub>11.31</sub> Si <sub>1.69</sub> H <sub>1.51</sub> I  | 54.7 | Cubic     | Fm $\bar{3}$ c (226) | a = 11.58            | 1,554.52 |
|     | LaFe <sub>11.31</sub> Si <sub>1.69</sub> H <sub>1.51</sub> II | 42.3 | Cubic     | Fm $\bar{3}$ c (226) | a = 11.56            | 1,545.72 |
|     | Mn <sub>3</sub> Si                                            | 2.5  | Cubic     | Fm $\bar{3}$ m (225) | a = 5.74             | 188.72   |
|     | La <sub>2</sub> O <sub>3</sub>                                | 0.4  | Hexagonal | P $\bar{3}$ m1 (164) | a = 3.94<br>c = 6.14 | 82.68    |
| S6  | LaFe <sub>11.31</sub> Si <sub>1.69</sub> H <sub>1.51</sub> I  | 63.2 | Cubic     | Fm $\bar{3}$ c (226) | a = 11.59            | 1,558.82 |
|     | LaFe <sub>11.31</sub> Si <sub>1.69</sub> H <sub>1.51</sub> II | 31.8 | Cubic     | Fm $\bar{3}$ c (226) | a = 11.57            | 1,549.31 |
|     | Mn <sub>3</sub> Si                                            | 4.6  | Cubic     | Fm $\bar{3}$ m (225) | a = 5.74             | 188.72   |
|     | La <sub>2</sub> O <sub>3</sub>                                | 0.4  | Hexagonal | P $\bar{3}$ m1 (164) | a = 3.94<br>c = 6.14 | 82.68    |
| S7  | LaFe <sub>11.31</sub> Si <sub>1.69</sub> H <sub>1.51</sub> I  | 93.2 | Cubic     | Fm $\bar{3}$ c (226) | a = 11.51            | 1,523.27 |
|     | LaFe <sub>11.31</sub> Si <sub>1.69</sub> H <sub>1.51</sub> II | 1.5  | Cubic     | Fm $\bar{3}$ c (226) | a = 11.59            | 1,558.82 |
|     | Mn <sub>3</sub> Si                                            | 4.5  | Cubic     | Fm $\bar{3}$ m (225) | a = 5.73             | 188.33   |
|     | La <sub>2</sub> O <sub>3</sub>                                | 0.8  | Hexagonal | P $\bar{3}$ m1 (164) | a = 3.94<br>c = 6.14 | 82.40    |
| S8  | LaFe <sub>11.31</sub> Si <sub>1.69</sub> H <sub>1.51</sub> I  | 93.8 | Cubic     | Fm $\bar{3}$ c (226) | a = 11.60            | 1,560.55 |
|     | LaFe <sub>11.31</sub> Si <sub>1.69</sub> H <sub>1.51</sub> II | 1.3  | Cubic     | Fm $\bar{3}$ c (226) | a = 11.51            | 1,523.27 |
|     | Mn <sub>3</sub> Si                                            | 4.4  | Cubic     | Fm $\bar{3}$ m (225) | a = 5.73             | 188.32   |
|     | La <sub>2</sub> O <sub>3</sub>                                | 0.5  | Hexagonal | P $\bar{3}$ m1 (164) | a = 3.94<br>c = 6.14 | 82.40    |
| S9  | LaFe <sub>11.31</sub> Si <sub>1.69</sub> H <sub>1.51</sub> I  | 94.3 | Cubic     | Fm $\bar{3}$ c (226) | a = 11.60            | 1,561.60 |
|     | LaFe <sub>11.31</sub> Si <sub>1.69</sub> H <sub>1.51</sub> II | 0.9  | Cubic     | Fm $\bar{3}$ c (226) | a = 11.51            | 1,523.26 |
|     | Mn <sub>3</sub> Si                                            | 4.3  | Cubic     | Fm $\bar{3}$ m (225) | a = 5.73             | 188.33   |
|     | La <sub>2</sub> O <sub>3</sub>                                | 0.5  | Hexagonal | P $\bar{3}$ m1 (164) | a = 3.94<br>c = 6.14 | 82.40    |
| S10 | LaFe <sub>11.31</sub> Si <sub>1.69</sub> H <sub>1.51</sub> I  | 93.3 | Cubic     | Fm $\bar{3}$ c (226) | a = 11.60            | 1,562.33 |
|     | LaFe <sub>11.31</sub> Si <sub>1.69</sub> H <sub>1.51</sub> II | 1.2  | Cubic     | Fm $\bar{3}$ c (226) | a = 11.51            | 1,523.27 |
|     | Mn <sub>3</sub> Si                                            | 4.9  | Cubic     | Fm $\bar{3}$ m (225) | a = 5.74             | 188.70   |
|     | La <sub>2</sub> O <sub>3</sub>                                | 0.6  | Hexagonal | P $\bar{3}$ m1 (164) | a = 3.94<br>c = 6.14 | 82.40    |
| S11 | LaFe <sub>11.31</sub> Si <sub>1.69</sub> H <sub>1.51</sub> I  | 93.9 | Cubic     | Fm $\bar{3}$ c (226) | a = 11.61            | 1,564.19 |
|     | LaFe <sub>11.31</sub> Si <sub>1.69</sub> H <sub>1.51</sub> II | 0.2  | Cubic     | Fm $\bar{3}$ c (226) | a = 11.51            | 1,523.27 |
|     | Mn <sub>3</sub> Si                                            | 5.5  | Cubic     | Fm $\bar{3}$ m (225) | a = 5.74             | 188.73   |
|     | La <sub>2</sub> O <sub>3</sub>                                | 0.4  | Hexagonal | P $\bar{3}$ m1 (164) | a = 3.94<br>c = 6.14 | 82.40    |

**Table S2.** Results of the qualitative and quantitative phase analysis for the Galinstan exposed magnetocaloric powders S1<sub>mix</sub> – S11<sub>mix</sub>.

| Sample            | Phase                                                        | Wt. % | Crystal System | Space Group (No.)    | Lattice Parameter (Å) | Volume (Å <sup>3</sup> ) |
|-------------------|--------------------------------------------------------------|-------|----------------|----------------------|-----------------------|--------------------------|
| S1 <sub>mix</sub> | LaFe <sub>11.31</sub> Si <sub>1.69</sub> H <sub>1.51</sub> I | 55.7  | Cubic          | Fm $\bar{3}$ c (226) | a = 11.60             | 1,562.54                 |

|                   |                                                               |      |              |                          |                                  |          |
|-------------------|---------------------------------------------------------------|------|--------------|--------------------------|----------------------------------|----------|
|                   | LaFe <sub>11.31</sub> Si <sub>1.69</sub> H <sub>1.51</sub> II | 36.7 | Cubic        | Fm $\bar{3}$ c (226)     | a = 11.57                        | 1,547.02 |
|                   | Mn <sub>3</sub> Si                                            | 2.6  | Cubic        | Fm $\bar{3}$ m (225)     | a = 5.74                         | 188.72   |
|                   | La <sub>2</sub> O <sub>3</sub>                                | 0.6  | Hexagonal    | P $\bar{3}$ m1 (164)     | a = 3.94<br>c = 6.14             | 82.49    |
|                   | GaO(OH)                                                       | 4.4  | Orthorhombic | Pnma (62)                | a = 9.84<br>b = 2.97<br>c = 4.58 | 133.82   |
|                   |                                                               |      |              |                          |                                  |          |
| S2 <sub>mix</sub> | LaFe <sub>11.31</sub> Si <sub>1.69</sub> H <sub>1.51</sub> I  | 78.9 | Cubic        | Fm $\bar{3}$ c (226)     | a = 11.60                        | 1,561.71 |
|                   | LaFe <sub>11.31</sub> Si <sub>1.69</sub> H <sub>1.51</sub> II | 14.3 | Cubic        | Fm $\bar{3}$ c (226)     | a = 11.57                        | 1,547.64 |
|                   | Mn <sub>3</sub> Si                                            | 3.5  | Cubic        | Fm $\bar{3}$ m (225)     | a = 5.74                         | 188.72   |
|                   | La <sub>2</sub> O <sub>3</sub>                                | 0.8  | Hexagonal    | P $\bar{3}$ m1 (164)     | a = 3.94<br>c = 6.14             | 82.49    |
|                   | GaO(OH)                                                       | 2.4  | Orthorhombic | Pnma (62)                | a = 9.84<br>b = 2.97<br>c = 4.58 | 133.81   |
| S3 <sub>mix</sub> | LaFe <sub>11.31</sub> Si <sub>1.69</sub> H <sub>1.51</sub> I  | 75.0 | Cubic        | Fm $\bar{3}$ c (226)     | a = 11.61                        | 1,562.95 |
|                   | LaFe <sub>11.31</sub> Si <sub>1.69</sub> H <sub>1.51</sub> II | 12.2 | Cubic        | Fm $\bar{3}$ c (226)     | a = 11.57                        | 1,547.77 |
|                   | Mn <sub>3</sub> Si                                            | 3.1  | Cubic        | Fm $\bar{3}$ m (225)     | a = 5.74                         | 188.72   |
|                   | La <sub>2</sub> O <sub>3</sub>                                | 0.4  | Hexagonal    | P6 <sub>3</sub> /m (176) | a = 3.94<br>c = 6.14             | 82.68    |
|                   | GaO(OH)                                                       | 9.3  | Orthorhombic | Pnma (62)                | a = 9.83<br>b = 2.97<br>c = 4.59 | 133.89   |
| S4 <sub>mix</sub> | LaFe <sub>11.31</sub> Si <sub>1.69</sub> H <sub>1.51</sub> I  | 79.3 | Cubic        | Fm $\bar{3}$ c (226)     | a = 11.60                        | 1,561.95 |
|                   | LaFe <sub>11.31</sub> Si <sub>1.69</sub> H <sub>1.51</sub> II | 11.0 | Cubic        | Fm $\bar{3}$ c (226)     | a = 11.57                        | 1,548.18 |
|                   | Mn <sub>3</sub> Si                                            | 1.9  | Cubic        | Fm $\bar{3}$ m (225)     | a = 5.74                         | 188.72   |
|                   | La <sub>2</sub> O <sub>3</sub>                                | 0.5  | Hexagonal    | P $\bar{3}$ m1 (164)     | a = 3.94<br>c = 6.14             | 82.68    |
|                   | GaO(OH)                                                       | 7.3  | Orthorhombic | Pnma (62)                | a = 9.83<br>b = 2.97<br>c = 4.59 | 134.02   |
| S5 <sub>mix</sub> | LaFe <sub>11.31</sub> Si <sub>1.69</sub> H <sub>1.51</sub> I  | 90.9 | Cubic        | Fm $\bar{3}$ c (226)     | a = 11.61                        | 1,567.71 |
|                   | LaFe <sub>11.31</sub> Si <sub>1.69</sub> H <sub>1.51</sub> II | 0.3  | Cubic        | Fm $\bar{3}$ c (226)     | a = 11.57                        | 1,548.30 |
|                   | Mn <sub>3</sub> Si                                            | 2.0  | Cubic        | Fm $\bar{3}$ m (225)     | a = 5.74                         | 188.72   |
|                   | La <sub>2</sub> O <sub>3</sub>                                | 0.5  | Hexagonal    | P $\bar{3}$ m1 (164)     | a = 3.94<br>c = 6.14             | 82.68    |
|                   | GaO(OH)                                                       | 6.3  | Orthorhombic | Pnma (62)                | a = 9.83<br>b = 2.97<br>c = 4.58 | 133.93   |
| S6 <sub>mix</sub> | LaFe <sub>11.31</sub> Si <sub>1.69</sub> H <sub>1.51</sub> I  | 87.2 | Cubic        | Fm $\bar{3}$ c (226)     | a = 11.61                        | 1,565.01 |
|                   | LaFe <sub>11.31</sub> Si <sub>1.69</sub> H <sub>1.51</sub> II | 0.2  | Cubic        | Fm $\bar{3}$ c (226)     | a = 11.57                        | 1,548.30 |
|                   | Mn <sub>3</sub> Si                                            | 1.8  | Cubic        | Fm $\bar{3}$ m (225)     | a = 5.74                         | 188.72   |
|                   | La <sub>2</sub> O <sub>3</sub>                                | 0.5  | Hexagonal    | P $\bar{3}$ m1 (164)     | a = 3.94                         | 82.68    |

|                    |                                                               |      |              |                      |                                              |          |
|--------------------|---------------------------------------------------------------|------|--------------|----------------------|----------------------------------------------|----------|
|                    |                                                               |      |              |                      | c = 6.14<br>a = 9.83<br>b = 2.97<br>c = 4.59 |          |
|                    | GaO(OH)                                                       | 10.3 | Orthorhombic | Pnma (62)            |                                              | 133.91   |
| S7 <sub>mix</sub>  | LaFe <sub>11.31</sub> Si <sub>1.69</sub> H <sub>1.51</sub> I  | 86.5 | Cubic        | Fm $\bar{3}$ c (226) | a = 11.61                                    | 1,563.43 |
|                    | LaFe <sub>11.31</sub> Si <sub>1.69</sub> H <sub>1.51</sub> II | 1.9  | Cubic        | Fm $\bar{3}$ c (226) | a = 11.55                                    | 1,542.22 |
|                    | Mn <sub>3</sub> Si                                            | 2.0  | Cubic        | Fm $\bar{3}$ m (225) | a = 5.74                                     | 188.72   |
|                    | La <sub>2</sub> O <sub>3</sub>                                | 0.5  | Hexagonal    | P $\bar{3}$ m1 (164) | a = 3.94<br>c = 6.14                         | 82.68    |
|                    |                                                               |      |              |                      | a = 9.83<br>b = 2.97<br>c = 4.59             |          |
|                    | GaO(OH)                                                       | 9.1  | Orthorhombic | Pnma (62)            |                                              | 133.95   |
| S8 <sub>mix</sub>  | LaFe <sub>11.31</sub> Si <sub>1.69</sub> H <sub>1.51</sub> I  | 94.8 | Cubic        | Fm $\bar{3}$ c (226) | a = 11.61                                    | 1,564.28 |
|                    | Mn <sub>3</sub> Si                                            | 2.4  | Cubic        | Fm $\bar{3}$ m (225) | a = 5.74                                     | 188.72   |
|                    | La <sub>2</sub> O <sub>3</sub>                                | 0.5  | Hexagonal    | P $\bar{3}$ m1 (164) | a = 3.94<br>c = 6.14                         | 82.68    |
|                    |                                                               |      |              |                      | a = 9.83<br>b = 2.97<br>c = 4.59             |          |
|                    | GaO(OH)                                                       | 2.2  | Orthorhombic | Pnma (62)            |                                              | 133.97   |
| S9 <sub>mix</sub>  | LaFe <sub>11.31</sub> Si <sub>1.69</sub> H <sub>1.51</sub> I  | 92.1 | Cubic        | Fm $\bar{3}$ c (226) | a = 11.61                                    | 1,565.36 |
|                    | Mn <sub>3</sub> Si                                            | 2.7  | Cubic        | Fm $\bar{3}$ m (225) | a = 5.74                                     | 188.72   |
|                    | La <sub>2</sub> O <sub>3</sub>                                | 0.5  | Hexagonal    | P $\bar{3}$ m1 (164) | a = 3.94<br>c = 6.14                         | 82.68    |
|                    |                                                               |      |              |                      | a = 9.83<br>b = 2.97<br>c = 4.59             |          |
|                    | GaO(OH)                                                       | 4.4  | Orthorhombic | Pnma (62)            |                                              | 133.97   |
| S10 <sub>mix</sub> | GaSb                                                          | 0.3  | Cubic        | F $\bar{4}$ 3m       | a = 6.11                                     | 228.10   |
|                    | LaFe <sub>11.31</sub> Si <sub>1.69</sub> H <sub>1.51</sub> I  | 92.5 | Cubic        | Fm $\bar{3}$ c (226) | a = 11.62                                    | 1,568.78 |
|                    | Mn <sub>3</sub> Si                                            | 2.5  | Cubic        | Fm $\bar{3}$ m (225) | a = 5.74                                     | 188.72   |
|                    | La <sub>2</sub> O <sub>3</sub>                                | 0.5  | Hexagonal    | P $\bar{3}$ m1 (164) | a = 3.94<br>c = 6.14                         | 82.68    |
|                    |                                                               |      |              |                      | a = 9.83<br>b = 2.97<br>c = 4.59             |          |
| S11 <sub>mix</sub> | GaO(OH)                                                       | 4.1  | Orthorhombic | Pnma (62)            |                                              | 133.97   |
|                    | GaSb                                                          | 0.3  | Cubic        | F $\bar{4}$ 3m       | a = 6.11                                     | 228.10   |
|                    | LaFe <sub>11.31</sub> Si <sub>1.69</sub> H <sub>1.51</sub> I  | 87.3 | Cubic        | Fm $\bar{3}$ c (226) | a = 11.61                                    | 1,565.84 |
|                    | Mn <sub>3</sub> Si                                            | 2.5  | Cubic        | Fm $\bar{3}$ m (225) | a = 5.74                                     | 188.72   |
|                    | La <sub>2</sub> O <sub>3</sub>                                | 0.4  | Hexagonal    | P $\bar{3}$ m1 (164) | a = 3.94<br>c = 6.14                         | 82.68    |
|                    |                                                               |      |              |                      | a = 9.83<br>b = 2.97<br>c = 4.58             |          |
| S11 <sub>mix</sub> | GaO(OH)                                                       | 8.3  | Orthorhombic | Pnma (62)            |                                              | 133.81   |
|                    | GaSb                                                          | 0.9  | Cubic        | F $\bar{4}$ 3m       | a = 6.11                                     | 228.10   |
|                    | LaMn <sub>0.87</sub> Sb <sub>2</sub>                          | 0.6  | Tetragonal   | P4/nmm               | a = 4.47<br>c = 10.65                        | 212.89   |
